# Supplementary material for: Developing ovine mammary terminal duct lobular units have a dynamic mucosal and stromal immune microenvironment
Source: PubMed Central journal article supplement (PMC8379191; doi:10.1038/s42003-021-02502-6), 2021-08-20
Supplement: 42003_2021_2502_MOESM1_ESM.pdf [file 42003_2021_2502_MOESM1_ESM.pdf]

Developing ovine mammary terminal duct lobular units have a dynamic mucosal and stromal immune microenvironment

Supplementary information

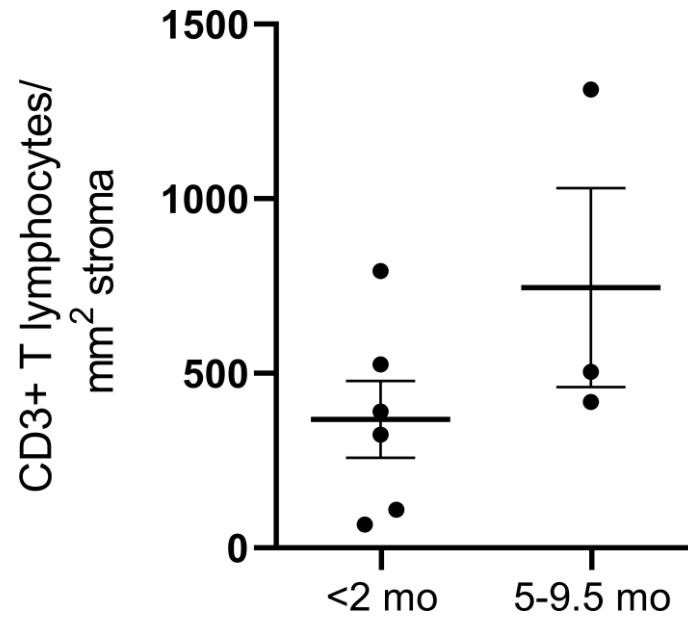

**Supplementary Figure 1. The overall abundance of stromal T lymphocytes is similar in younger and older lambs.** Scatter plot demonstrating distributions of stromal T lymphocytes in lambs less than two months old (< 2 mo) and aged 5-9.5 months (5-9.5 mo). Dots represent CD3+ lymphocyte densities from individual lambs. Bars represent mean +/- standard deviation.

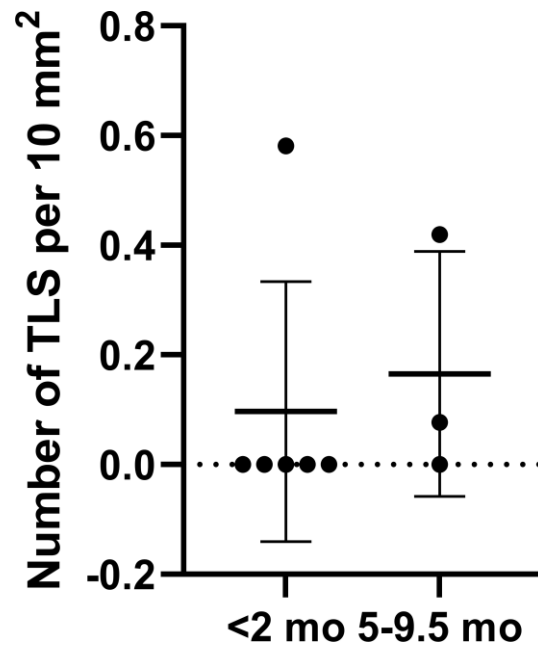

**Supplementary Figure 2. The density of tertiary lymphoid structures (TLS) does not differ significantly between neonatal and older lambs.** Scatter plot demonstrating density of TLS in lambs less than two months old (< 2 mo) and aged 5-9.5 months (5-9.5 mo). Dots represent individual lambs. Bars represent mean +/- standard deviation.

**Supplementary Table 1. Data for individual sheep used in the study.**  
do, days old; wo, weeks old; mo, months old; SUP, supplementary figure.

| Case number | Source        | Age    | Breed          | UK meteorological season died/<br>euthanased | Figures for which used    |
|-------------|---------------|--------|----------------|----------------------------------------------|---------------------------|
| 1           | Diagnostic PM | 1 do   | Lleyn cross    | Winter                                       | 2; 4                      |
| 2           | Diagnostic PM | 2 do   | Lleyn cross    | Winter                                       | 1; 4; 5; SUP1; SUP2       |
| 3           | Diagnostic PM | 1 do   | Lleyn cross    | Winter                                       | 1; 4                      |
| 4           | Diagnostic PM | 1 do   | Lleyn cross    | Winter                                       | 1; 2; 4; 5; SUP1; SUP2    |
| 5           | Diagnostic PM | 1 do   | Lleyn cross    | Winter                                       | 2; 4                      |
| 6           | Diagnostic PM | 2 wo   | Lleyn cross    | Winter                                       | 4                         |
| 7           | Diagnostic PM | 2 wo   | Lleyn cross    | Winter                                       | 2; 4                      |
| 8           | Diagnostic PM | 1 do   | Lleyn cross    | Winter                                       | 2; 3                      |
| 9           | Diagnostic PM | 1 do   | Lleyn cross    | Winter                                       | 2                         |
| 10          | Diagnostic PM | 1 do   | Lleyn cross    | Winter                                       | 2; 5; SUP1; SUP2          |
| 11          | Diagnostic PM | 1 do   | Mule cross     | Winter                                       | 5; SUP1; SUP2             |
| 12          | Diagnostic PM | 1 mo   | Suffolk cross  | Spring                                       | 2                         |
| 13          | Diagnostic PM | 2 mo   | Suffolk cross  | Summer                                       | 2; 4                      |
| 14          | Diagnostic PM | 2 mo   | Lleyn          | Spring                                       | 1; 4; 5; SUP1; SUP2       |
| 15          | Diagnostic PM | 1 do   | Mule cross     | Winter                                       | 2; 5; SUP1; SUP2          |
| 16          | Diagnostic PM | 7 mo   | Not recorded   | Autumn                                       | 2; 3; 4; 5; SUP1; SUP2    |
| 17          | Diagnostic PM | 5 mo   | Texel cross    | Summer                                       | 1; 2; 3; 4; 5; SUP1; SUP2 |
| 18          | Diagnostic PM | 6 mo   | Lleyn          | Summer                                       | 4                         |
| 19          | Diagnostic PM | 6 mo   | Lleyn          | Summer                                       | 4                         |
| 20          | Research      | 8 mo   | Welsh mountain | Winter                                       | 2; 4; 5; SUP1; SUP2       |
| 21          | Research      | 9.5 mo | Welsh mountain | Spring                                       | 2                         |
| 22          | Research      | 9.5 mo | Welsh mountain | Winter                                       | 2                         |
| 23          | Research      | 11 mo  | Welsh mountain | Winter                                       | 4                         |
| 24          | Research      | 12 mo  | Welsh mountain | Summer                                       | 4                         |
| 25          | Research      | 11 mo  | Welsh mountain | Summer                                       | 4; 5                      |
