# Supplementary material for: Developing ovine mammary terminal duct lobular units have a dynamic mucosal and stromal immune microenvironment
Source: PubMed Central journal article supplement (PMC8379191; doi:10.1038/s42003-021-02502-6), 2021-08-20
Supplement: 42003_2021_2502_MOESM2_ESM.pdf [file 42003_2021_2502_MOESM2_ESM.pdf]

## Description of Additional Supplementary Files

**File name:** Supplementary Movie 1

**Description:** Three-dimensional rendering demonstrating the intimate association between myoepithelial cells (SMA; grey) and macrophages (IBA1; magenta) in CUBIC-cleared developing lamb mammary TDLUs.

**File name:** Supplementary Data 1

**Description:** Source data for graphs and charts.
